# Supplementary material for: Sodium Content of Foods Sold in the Spanish Market. Results from the BADALI Project
Source: MDPI journal article supplement (doi:10.3390/nu13103410), 2021-09-27
Supplement: s1 [file s1]

## Supplementary Materials

**Table S1.** Description of the items included in the food groups.

| Food Group |                                                  | Foods                                                                                                                                                                                                                                                                                                                                                  |
|------------|--------------------------------------------------|--------------------------------------------------------------------------------------------------------------------------------------------------------------------------------------------------------------------------------------------------------------------------------------------------------------------------------------------------------|
| <b>G1</b>  | Bread and bread-like cereal derivatives          | Bread, breadcrumbs, toasts, croutons, bread slices and sticks, cakes (oatmeal, rice, corn), cereal tortillas, pizza dough, precooked bread, sliced bread, hamburger and hot dog buns                                                                                                                                                                   |
| <b>G2</b>  | Canned vegetables                                | Canned vegetable and legumes                                                                                                                                                                                                                                                                                                                           |
| <b>G3</b>  | Cereal sweet derivatives                         | Sweet and salty biscuits, breakfast cereals, cereal bars, pastries and pastry mix                                                                                                                                                                                                                                                                      |
| <b>G4</b>  | Cheese                                           | All kinds of cheese, including fresh, semi-cured, cured, cottage, whipped, spreads and creams                                                                                                                                                                                                                                                          |
| <b>G5</b>  | Dairies and substitutes                          | All kinds of milk including evaporated and powdered, flavoured milk shakes, coffees with milk, fermented milk, dairy desserts (curd, panna cotta, mousse, custard, rice pudding), vegetables drinks (oats, soy, wheat, spelt, rice, coconut, almond, tigernuts, nuts); vegetable alternative yogurts and desserts                                      |
| <b>G6</b>  | Fats                                             | Butter, margarine, lard, cooking or whipping cream, whipped cream, vegetable cream                                                                                                                                                                                                                                                                     |
| <b>G7</b>  | Fish/seafood – canned, processed and derivatives | Canned fish and seafood (clam, anchovy, eel, anguriña, herring, tuna, cod, cockle, bonito, mackerel, crab, squid, prawn, mussel, panga, octopus, salmon, sardine, cuttlefish, scallop); broths for paella (prepared for fish or seafood paella), liver, roe and fish derivatives (surimi and spreads)                                                  |
| <b>G8</b>  | Meat - processed and derivatives                 | Sausages, cold meat, luncheon meat, other processed meat, pate and spreads                                                                                                                                                                                                                                                                             |
| <b>G9</b>  | Non-alcoholic drinks                             | Fruit and vegetable smoothies, juices, nectars and beverages; non-alcoholic sangria, soft drinks, tonic water, soda water, non-alcoholic beer                                                                                                                                                                                                          |
| <b>G10</b> | One-type of ingredient                           | Cereal cakes, cereal flakes, nuts, dried fruit, dried legumes, processed vegetables, fish and seafood (frozen and fresh), grain cereals, seeds, flour, bran, gluten, germ                                                                                                                                                                              |
| <b>G11</b> | Other processed and plant based derivatives      | Processed foods from plant origin with added ingredients, creams, gazpacho, spreads, hummus, tomato-based sauces, tofu, seitan                                                                                                                                                                                                                         |
| <b>G12</b> | Pasta                                            | Pasta made of cereals, cereals with vegetables, legumes; semolina, bulgur, couscous                                                                                                                                                                                                                                                                    |
| <b>G13</b> | Precooked and ready-to-eat food <sup>1</sup>     | Ready-to-eat salads, meatloaf, cooked rice, chicken wings, onion rings; battered meat, vegetables, fish and squid; filled and ready-to-eat pasta dishes; churros, couscous, croquettes, falafel, nuggets, fingers, cooked vegetables, spring rolls, paellas, pizzas; vegetable alternative to processed meat (sausages, burgers, cold meat, meatballs) |

|            |        |                                                                                                                                                                                                                                                |
|------------|--------|------------------------------------------------------------------------------------------------------------------------------------------------------------------------------------------------------------------------------------------------|
| <b>G14</b> | Sauces | Bechamel, mayonnaise, ketchup, barbecue, hot, mustard, allioli, bittersweet, soy, pepper, andalouse, burger, caesar, chives, chimichurri, cocktail, curry, boletus, carbonara, pedro ximénez, cheese, yogurt, kebab, pesto, vinaigrette, spicy |
| <b>G15</b> | Snacks | Popcorn, chips (potato, legumes), corn snacks, wheat snacks (sticks), nachos, pork fried crusts, fried vegetables; snacks elaborated with potatoes, vegetables or legumes; salty nuts                                                          |
| <b>G16</b> | Sweets | Fruits and vegetable jams, honey, condensed milk, chocolates, chocolate bars, cocoa and derivatives, mix for chocolate products, chocolate snacks, turrón, caramelised nuts and vegetables, fruits in syrup, quince, sweets, fruit spreads     |

<sup>1</sup> Also included here those processed foods ready to eat with minimum cooking not included in other groups (according to the instructions in the pack). Foods in this group have added salt, fat and/or additives.

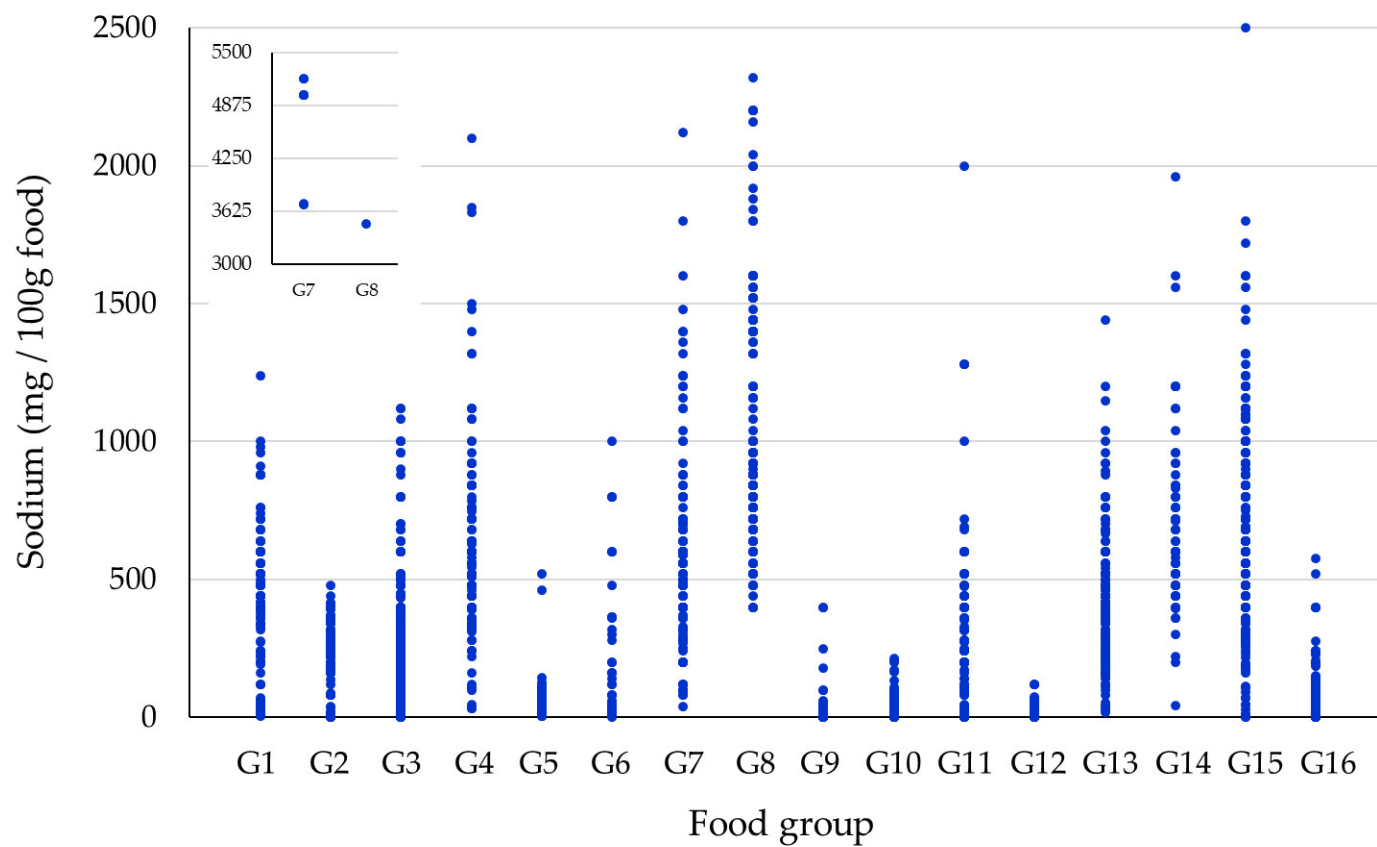

**Figure S1.-** Sodium content of all foods in the database

**Table S2.- Sodium content by specific food type**

| Food group                                        | Food type                   | No Foods | Median sodium (mg/100g) | 25th – 75th (mg sodium/100g) | WHO benchmarks [XX] | p <sup>1</sup> |
|---------------------------------------------------|-----------------------------|----------|-------------------------|------------------------------|---------------------|----------------|
| G1 - Bread                                        | Bread                       | 51       | 440                     | 400 - 520                    | 300 - 330           | 0.26           |
|                                                   | Cakes and toasts            | 84       | 440                     | 184 - 570                    |                     |                |
| G2 – Canned vegetables and legumes <sup>2</sup>   | --                          | 104      | 256                     | 169 – 345                    | 50                  | --             |
| G3 – Cereal sweet derivatives                     | Bakery – pastries           | 36       | 230 <sup>a,b</sup>      | 144 - 325                    | 120 - 205           | < 0.001*       |
|                                                   | Biscuits (sweet)            | 208      | 280 <sup>b</sup>        | 200 - 392                    | 265                 |                |
|                                                   | Breakfast cereals           | 82       | 182 <sup>a,c</sup>      | 28 – 332                     | 280                 |                |
|                                                   | Cereal bars                 | 29       | 160 <sup>c</sup>        | 124 - 216                    | -- <sup>3</sup>     |                |
| G4 - Cheese                                       | Fresh/soft                  | 83       | 440                     | 340 - 600                    | 4                   | < 0.001        |
|                                                   | Mature                      | 82       | 640                     | 560 - 840                    |                     |                |
| G5 – Dairies and substitutes                      | Dairies                     | 354      | 48                      | 40 – 60                      | -- <sup>3</sup>     | < 0.001        |
|                                                   | Substitutes                 | 111      | 40                      | 32 - 60                      | -- <sup>3</sup>     |                |
| G7 – Fish/seafood                                 | Canned                      | 206      | 520 <sup>5</sup>        | 400 - 600                    | 360                 | --             |
|                                                   | Smoked                      | 21       | 880                     | 600 – 1.240                  | 800                 | --             |
| G11 – Other processed and plant based derivatives | Tomato-based cooking sauces | 17       | 352                     | 200 - 400                    | 330                 | --             |
| G13                                               | Cereal-based                | 63       | 290                     | 200 - 360                    | 230 - 250           | --             |
|                                                   | Pizza                       | 10       | 760                     | 690 - 790                    | 450                 | --             |
|                                                   | Salads                      | 12       | 330                     | 254 - 402                    | 390                 | --             |
| G14 - Sauces                                      | Emulsion-based              | 45       | 560                     | 480 - 720                    | 500                 | < 0.005        |
|                                                   | Rest (no soy sauce)         | 29       | 800                     | 640 - 1040                   | 650                 |                |
| G15 - Snacks                                      | Cereals                     | 142      | 720 <sup>a</sup>        | 560 – 990                    | 500 - 520           | < 0.001*       |
|                                                   | Nuts                        | 60       | 420 <sup>b</sup>        | 238 – 728                    | 280                 |                |
|                                                   | Vegetables and potatoes     | 65       | 560 <sup>c</sup>        | 400 - 800                    | 500                 |                |

<sup>1</sup> Comparison analysis were only performed when No of foods was at least 25/food type; <sup>2</sup> Data from Table 3 for comparison with WHO benchmarks; <sup>3</sup> No benchmarks defined by WHO [25]; <sup>4</sup> Dissimilar subcategories with the WHO benchmarks; <sup>5</sup> When anchovies were not considered, as in WHO classification, median = 500 mg/100g. \* P values when comparing all the food types, while different lower case letters indicate significant differences by pair of food types.

**Table S3.-** Sodium content per serving for the precooked and ready-to eat food group

|                    |                                 | <b>Sodium (mg)/serving<br/>(n=141)</b> | <b>% IR</b> |
|--------------------|---------------------------------|----------------------------------------|-------------|
| <b>Percentiles</b> | <b>Mean</b>                     | 591.1                                  | 29.6        |
|                    | <b>SD</b>                       | 374.3                                  | 18.7        |
|                    | <b>Min</b>                      | 50                                     | 2.5         |
|                    | <b>25<sup>th</sup></b>          | 304                                    | 15.2        |
|                    | <b>50<sup>th</sup> (Median)</b> | 507.5                                  | 25.4        |
|                    | <b>75<sup>th</sup></b>          | 800                                    | 40          |
|                    | <b>Max</b>                      | 2296                                   | 114.8       |

SD: Standard deviation, % IR: Percentage of recommended intake for adults (2 g sodium/day) [10]

**Table S4.-** Foods in conformity with the nutritional claims regulated by the European Regulation No 1924/2006 [39] and Codex Alimentarius [40] or exceeding the NPMs thresholds for sodium, by group.

| Food Groups | Sodium-free (%) <sup>1</sup> | Very low sodium (%) <sup>1</sup> | Low sodium (%) <sup>1</sup> | High sodium                 |                              |
|-------------|------------------------------|----------------------------------|-----------------------------|-----------------------------|------------------------------|
|             |                              |                                  |                             | PAHO - NPM (%) <sup>1</sup> | Chile - NPM (%) <sup>1</sup> |
| Total       | 460 (12.7) <sup>2</sup>      | 1171 (32.4) <sup>2</sup>         | 1744 (48.2) <sup>2</sup>    | 1705 (47.2) <sup>2</sup>    | 1153 (31.9) <sup>2</sup>     |
| G1          | 1 (0.2)                      | 10 (0.9)                         | 21 (1.2)                    | 104 (6.1)                   | 86 (7.5)                     |
| G2          | 4 (0.9)                      | 10 (0.9)                         | 22 (1.3)                    | 94 (5.5)                    | 4 (0.3)                      |
| G3          | 9 (2)                        | 34 (2.9)                         | 77 (4.4)                    | 55 (3.2)                    | 54 (4.7)                     |
| G4          | 0 (0)                        | 3 (0.3)                          | 8 (0.5)                     | 149 (8.7)                   | 117 (10.1)                   |
| G5          | 3 (0.7)                      | 204 (17.4)                       | 461 (26.4)                  | 145 (8.5)                   | 4 (0.3)                      |
| G6          | 1 (0.2)                      | 27 (2.3)                         | 36 (2.1)                    | 9 (0.5)                     | 11 (1)                       |
| G7          | 0 (0)                        | 1 (0.1)                          | 12 (0.7)                    | 241 (14.1) <sup>3</sup>     | 172 (14.9)                   |
| G8          | 0 (0)                        | 0 (0)                            | 0 (0)                       | 279 (16.3)                  | 277 (24)                     |
| G9          | 145 (31.5)                   | 238 (20.4)                       | 242 (13.9)                  | 37 (2.2)                    | 4 (0.3)                      |
| G10         | 109 (23.7)                   | 238 (20.4)                       | 270 (15.5)                  | 31 (1.8)                    | 0 (0)                        |
| G11         | 9 (2)                        | 19 (1.6)                         | 31 (1.8)                    | 100 (5.9)                   | 52 (4.5)                     |
| G12         | 20 (4.3)                     | 105 (9)                          | 136 (7.8)                   | 0 (0)                       | 0 (0)                        |
| G13         | 0 (0)                        | 5 (0.4)                          | 12 (0.7)                    | 206 (12.1)                  | 90 (7.8)                     |
| G14         | 0 (0)                        | 0 (0)                            | 1 (0.1)                     | 60 (3.5)                    | 69 (6)                       |
| G15         | 3 (0.7)                      | 6 (0.5)                          | 14 (0.8)                    | 189 (11.1)                  | 210 (18.2)                   |
| G16         | 156 (33.9)                   | 271 (23.2)                       | 401 (23)                    | 6 (0.4)                     | 3 (0.3)                      |

<sup>1</sup> Calculated as No foods complying with the criteria per group x 100 / Total No foods complying with the criteria. <sup>2</sup> Calculated as Total No foods complying with the criteria x 100 / Total No foods surveyed. <sup>3</sup> n = 252: the criteria could not be applied to three foods because the kcal content could not be calculated

**Table S5.** Sodium content in different studies by group <sup>1</sup>.

| Food Group               | Country                    | No Foods | Sodium (mg/100g) |         | Comments / Reference                         |
|--------------------------|----------------------------|----------|------------------|---------|----------------------------------------------|
|                          |                            |          | Mean             | Median  |                                              |
| <b>Bakery and cakes</b>  | <b>BADALI</b> <sup>2</sup> | 355      | 276.8            | 252     | Cereal sweet products, including bakery [54] |
|                          | Argentina                  | 101      | 299.5            | 250     |                                              |
|                          | Costa Rica                 | 58       | 341              | 344     | Data for cakes / [28]                        |
|                          | Latin America              | 1443     | 383              | 328     | Data for cakes / [55]                        |
|                          | USA                        | 520      | 447.6            | --      | [29]                                         |
| <b>Bread</b>             | <b>BADALI</b> <sup>2</sup> | 144      | 442.3            | 440     |                                              |
|                          | Argentina                  | 110      | 442.7            | 443     | [54]                                         |
|                          | Costa Rica                 | 87       | 291-448          | 291-480 | Data for bread and wholemeal bread / [28]    |
|                          | Italy                      | 147      | 600              | --      | [56]                                         |
|                          | Latin America              | 1271     | 465              | 458     | [55]                                         |
|                          | Slovenia                   | 126      | 546              | --      | [30]                                         |
|                          | South Africa               | 174      | 542              | 476     | [57]                                         |
|                          | Spain                      | 1137     | 832              | --      | [47]                                         |
|                          | UK                         | 1651     | 405              | 400     | [58]                                         |
|                          | USA                        | 4466     | 455              | 459     | [58]                                         |
| <b>Canned vegetables</b> | <b>BADALI</b> <sup>2</sup> | 104      | 239.5            | 256     | Canned vegetables and legumes                |
|                          | Argentina                  | 147      | 251.6            | 196,9   | [54]                                         |
|                          | Slovenia                   | 330      | 484              | --      | [30]                                         |
|                          | South Africa               | 895      | 288              | 108     | Vegetables in general / [57]                 |
|                          | USA                        | 155      | 228.9            | --      | Vegetables in general / [29]                 |
| <b>Cheese</b>            | <b>BADALI</b> <sup>2</sup> | 165      | 606.2            | 560     |                                              |
|                          | Argentina                  | 316      | 628.5            | 583,3   | [54]                                         |
|                          | Latin America              | 1911     | 739              | 643     | [55]                                         |
|                          | Slovenia                   | 292      | 524              | --      | [30]                                         |
|                          | South Africa               | 240      | 654              | 554     | [57]                                         |
|                          | <b>BADALI</b> <sup>2</sup> | 255      | 692              | 560     |                                              |
|                          | Argentina                  | 123      | 655.9            | 411,7   | [54]                                         |

|                               |                            |      |        |       |                                                                                                  |
|-------------------------------|----------------------------|------|--------|-------|--------------------------------------------------------------------------------------------------|
| <b>Fish and fish products</b> | Slovenia                   | 155  | 659    | --    | Canned fish and seafood; 7 samples without salt were not included in the analysis / [30]<br>[57] |
|                               | South Africa               | 284  | 384    | 328   |                                                                                                  |
| <b>Meat</b>                   | <b>BADALI</b> <sup>2</sup> | 280  | 999.2  | 840   |                                                                                                  |
|                               | Argentina                  | 253  | 956.5  | 843,8 | [54]                                                                                             |
|                               | Latin America              | 2071 | 928    | 870   | [55]                                                                                             |
|                               | Slovenia                   | 362  | 984    | --    | [30]                                                                                             |
|                               | South Africa               | 545  | 850    | 734   | [57]                                                                                             |
|                               | USA                        | 396  | 1014.8 | --    | [29]                                                                                             |
| <b>Ready meals</b>            | <b>BADALI</b> <sup>2</sup> | 223  | 408.1  | 392   | Precooked and ready-to-eat food<br>[30]<br>[57]                                                  |
|                               | Slovenia                   | 206  | 510    | --    |                                                                                                  |
|                               | South Africa               | 156  | 422    | 382   |                                                                                                  |
| <b>Sauces</b>                 | <b>BADALI</b> <sup>2</sup> | 75   | 691.8  | 600   |                                                                                                  |
|                               | Argentina                  | 214  | 1247.3 | 850   | Sauces and spreads / [54]                                                                        |
|                               | India                      | 271  | 2217   | --    | Sauces and spread / [31]                                                                         |
|                               | Malaysia                   | 117  | 3164   | --    | [59]                                                                                             |
|                               | Slovenia                   | 273  | 1131   | --    | [30]                                                                                             |
|                               | South Africa               | 1059 | 1981   | 673   | Sauces and spreads / [57]                                                                        |
|                               | UK                         | 918  | 732    | 360   | [32]                                                                                             |
|                               | USA                        | 274  | 613.4  | --    | [29]                                                                                             |
| <b>Snacks</b>                 | <b>BADALI</b> <sup>2</sup> | 274  | 691.1  | 680   |                                                                                                  |
|                               | Argentina                  | 240  | 937.1  | 683,7 | [54]                                                                                             |
|                               | India                      | 200  | 666    | --    | [31]                                                                                             |
|                               | Latin America              | 2235 | 724    | 625   | [55]                                                                                             |
|                               | Slovenia                   | 206  | 787    | --    | [30]                                                                                             |
|                               | USA                        | 150  | 823.4  | --    | [29]                                                                                             |

<sup>1</sup> Only food groups which typically contain added salt and studies of at least 50 foods per group are included. <sup>2</sup>Present work
